# Supplementary material for: MichiGAN: sampling from disentangled representations of single-cell data using generative adversarial networks
Source: PubMed Central journal article supplement (PMC8139054; doi:10.1186/s13059-021-02373-4), 2021-05-20

## RESEARCH

# Supplementary material for “MichiGAN: sampling from disentangled representations of single-cell data using generative adversarial networks”

Hengshi Yu and Joshua D. Welch\*

\*Correspondence:

welchjd@umich.edu

Full list of author information is available at the end of the article

**Table S1:** Number of cells for each the cell type/drug combinations selected from the sci-Plex dataset

| Pathway                  | Treatment | Cell Type |      |      |
|--------------------------|-----------|-----------|------|------|
|                          |           | A549      | K562 | MCF7 |
| Protein Tyrosine Kinase  | S1010     | 1014      | 800  | 1548 |
| Angiogenesis             | S1021     | 791       | 506  | 1626 |
| PI3K/Akt/mTOR            | S1044     | 700       | 800  | 1530 |
| Others                   | S1045     | 882       | 787  | 1849 |
| Cytoskeletal Signaling   | S1090     | 1934      | 643  | 1928 |
| Epigenetics              | S1096     | 879       | 450  | 1688 |
| Apoptosis                | S1130     | 216       | 694  | 79   |
| Neuronal Signaling       | S1168     | 1009      | 1006 | 1984 |
| Stem Cells & Wnt         | S1180     | 934       | 934  | 1854 |
| Endocrinology & Hormones | S1191     | 957       | 982  | 1945 |
| DNA Damage               | S1192     | 808       | 803  | 1392 |
| GPCR & G Protein         | S1259     | 1061      | 1083 | 1682 |
| Proteases                | S1261     | 874       | 964  | 1759 |
| Cell Cycle               | S1529     | 1499      | 739  | 1077 |
| Metabolism               | S1628     | 902       | 1162 | 1899 |
| MAPK                     | S2673     | 724       | 730  | 1823 |
| TGF-beta/Smad            | S7207     | 2195      | 759  | 1431 |
| JAK/STAT                 | S7259     | 2846      | 875  | 2014 |

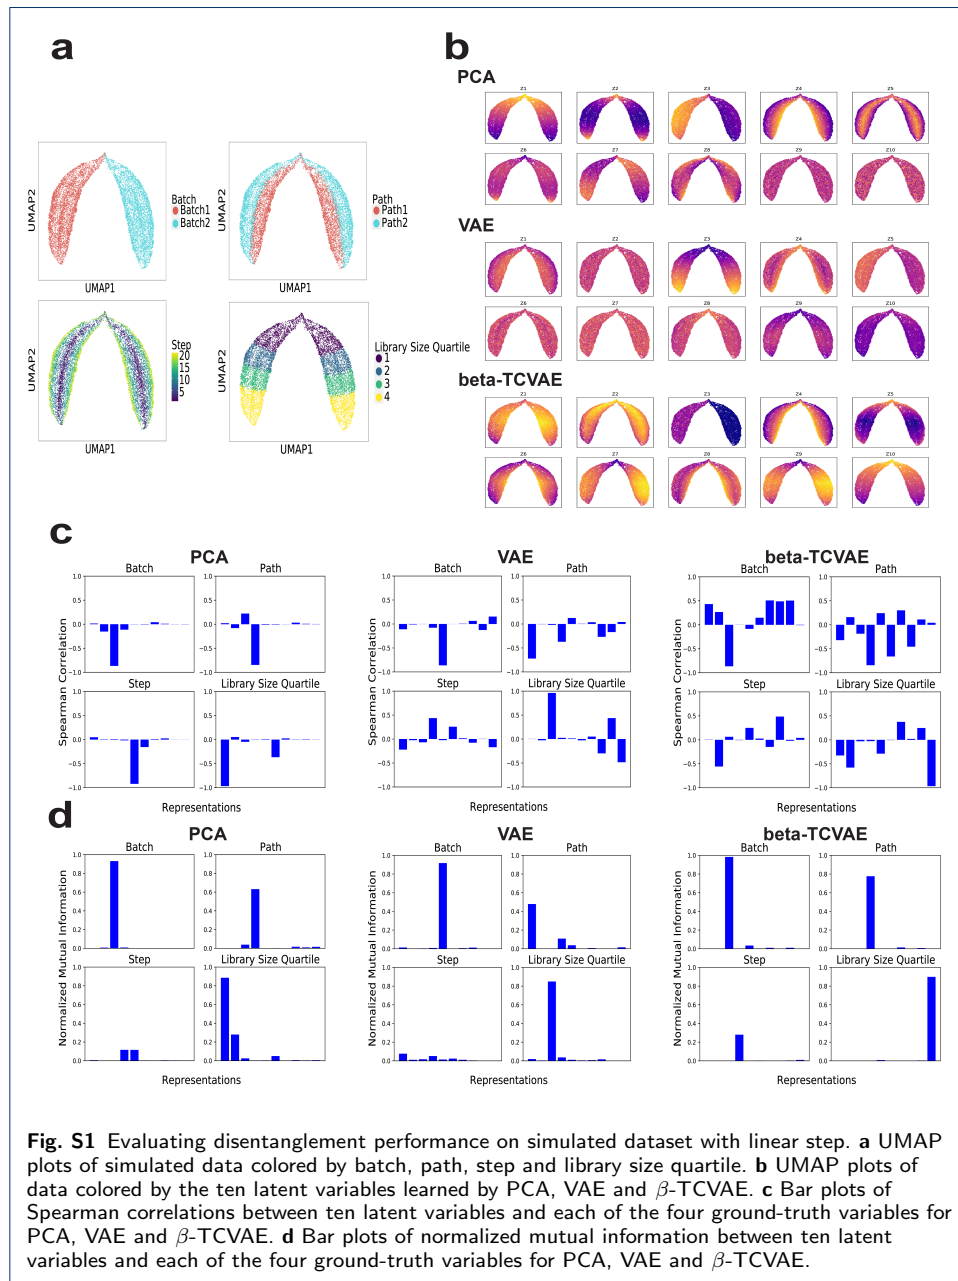

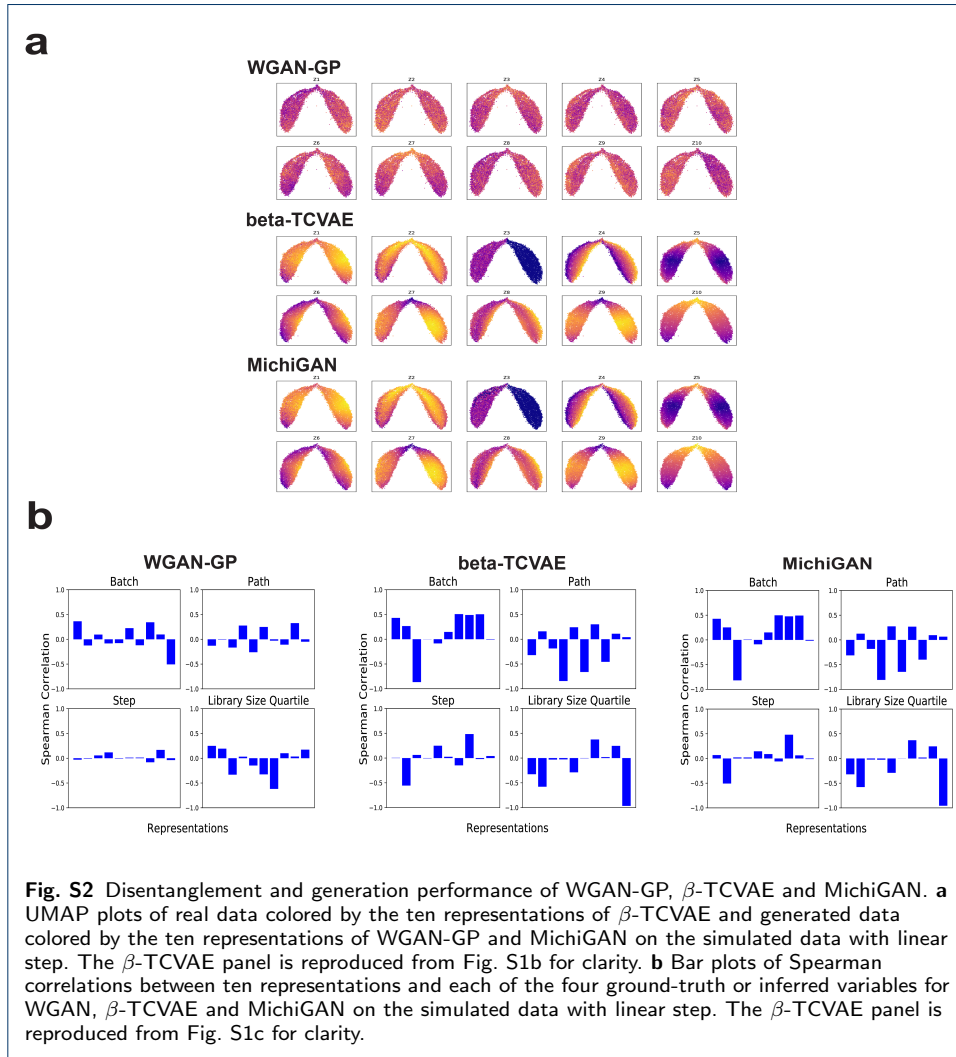

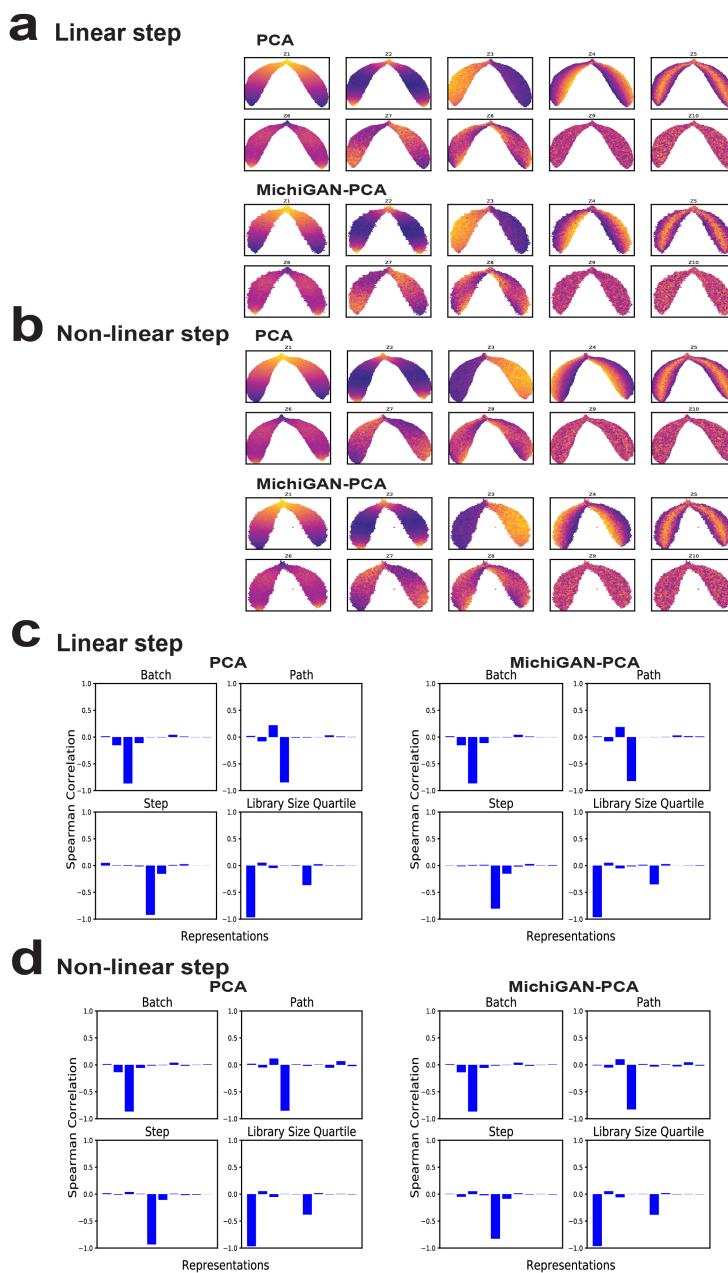

**Fig. S3** Disentanglement performance of PCA and MichiGAN-PCA. **a** UMAP plots of real data colored by ten representations of PCA and generated data colored by the MichiGAN-PCA representations on the simulated data with linear step. **b** UMAP plots of real data colored by ten representations of PCA and generated data colored by the MichiGAN-PCA representations on the simulated data with non-linear step. **c** Bar plots of Spearman correlations between ten representations and each of the four ground-truth or inferred variables for PCA and MichiGAN-PCA on the simulated data with linear step. **d** Bar plots of Spearman correlations between ten representations and each of the four ground-truth or inferred variables for PCA and MichiGAN-PCA on the simulated data with non-linear step. The PCA panels are reproduced from Fig. 1b-c and Fig. S1b-c for clarity.

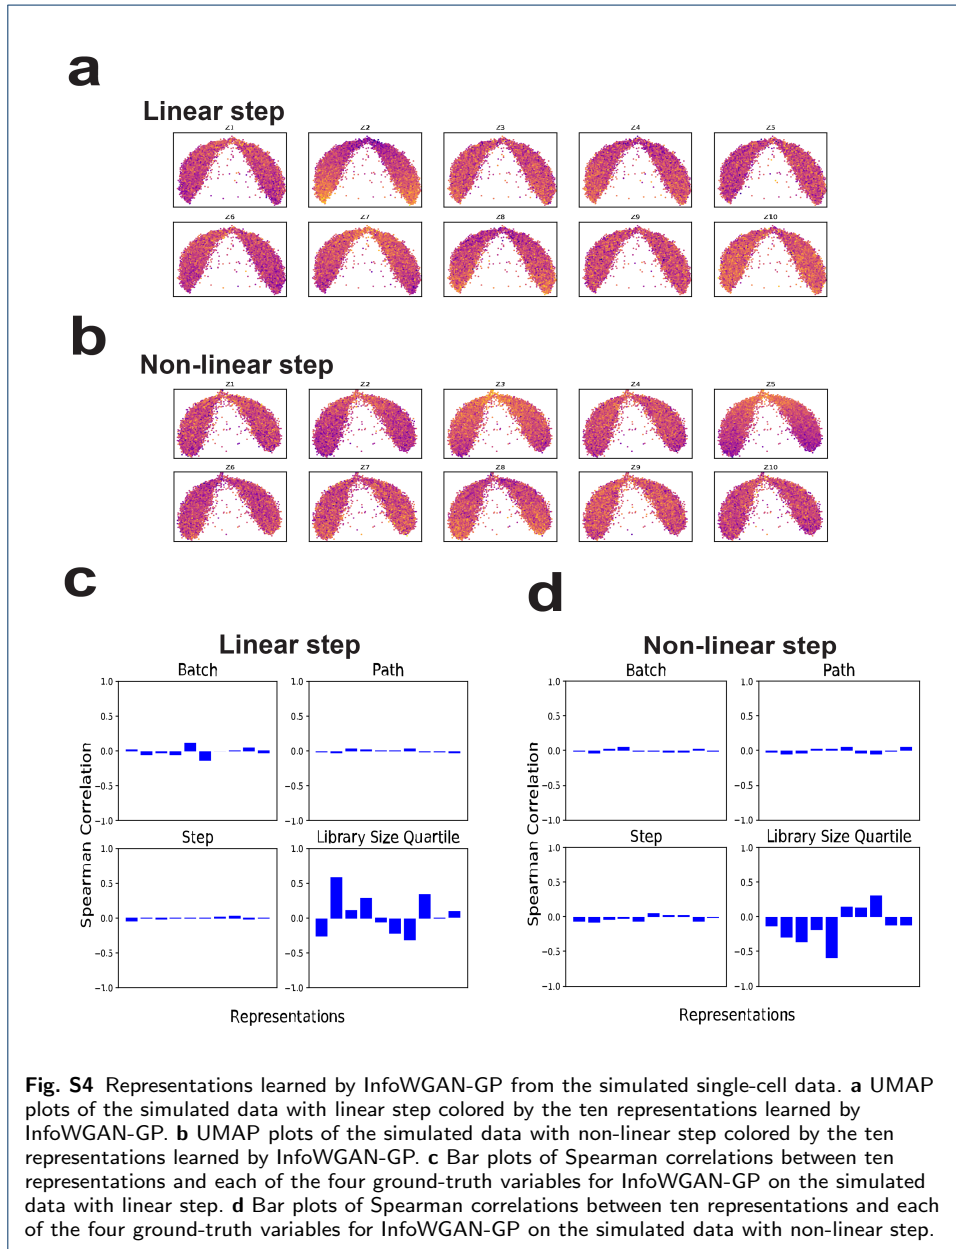

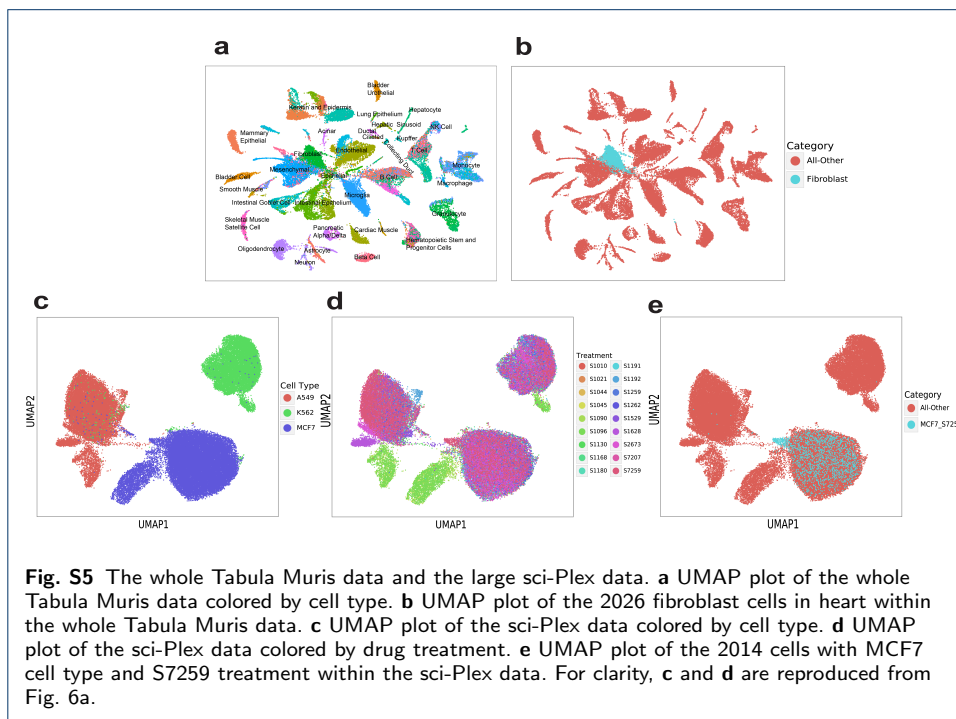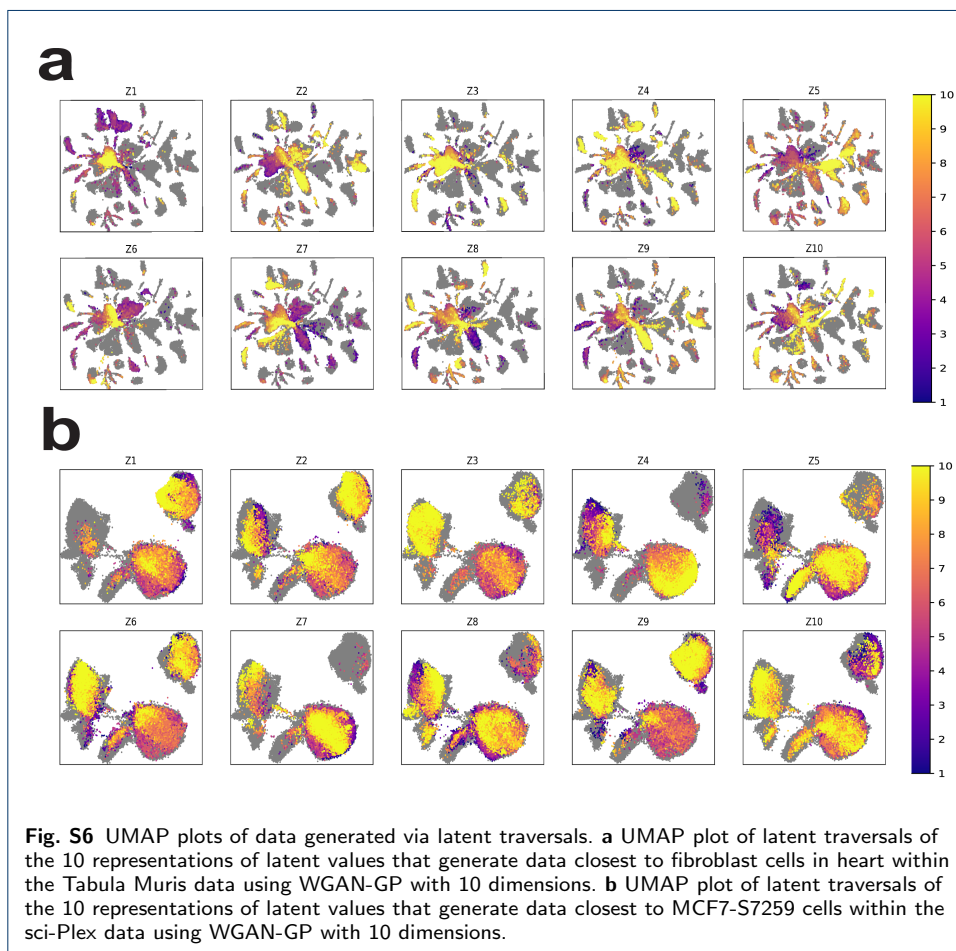

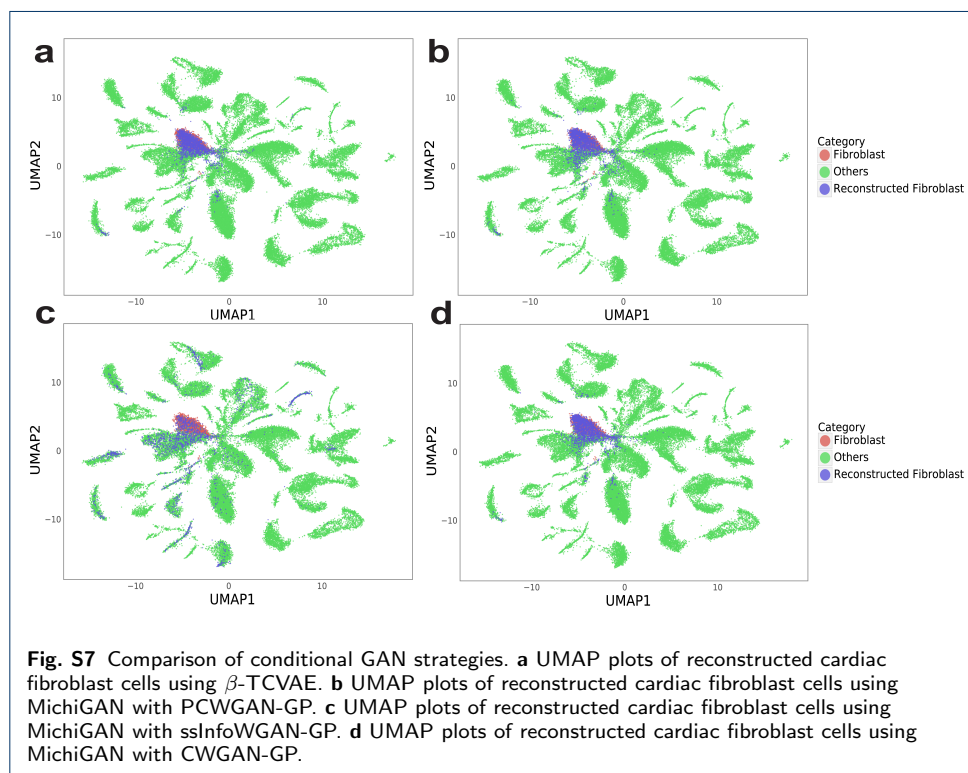

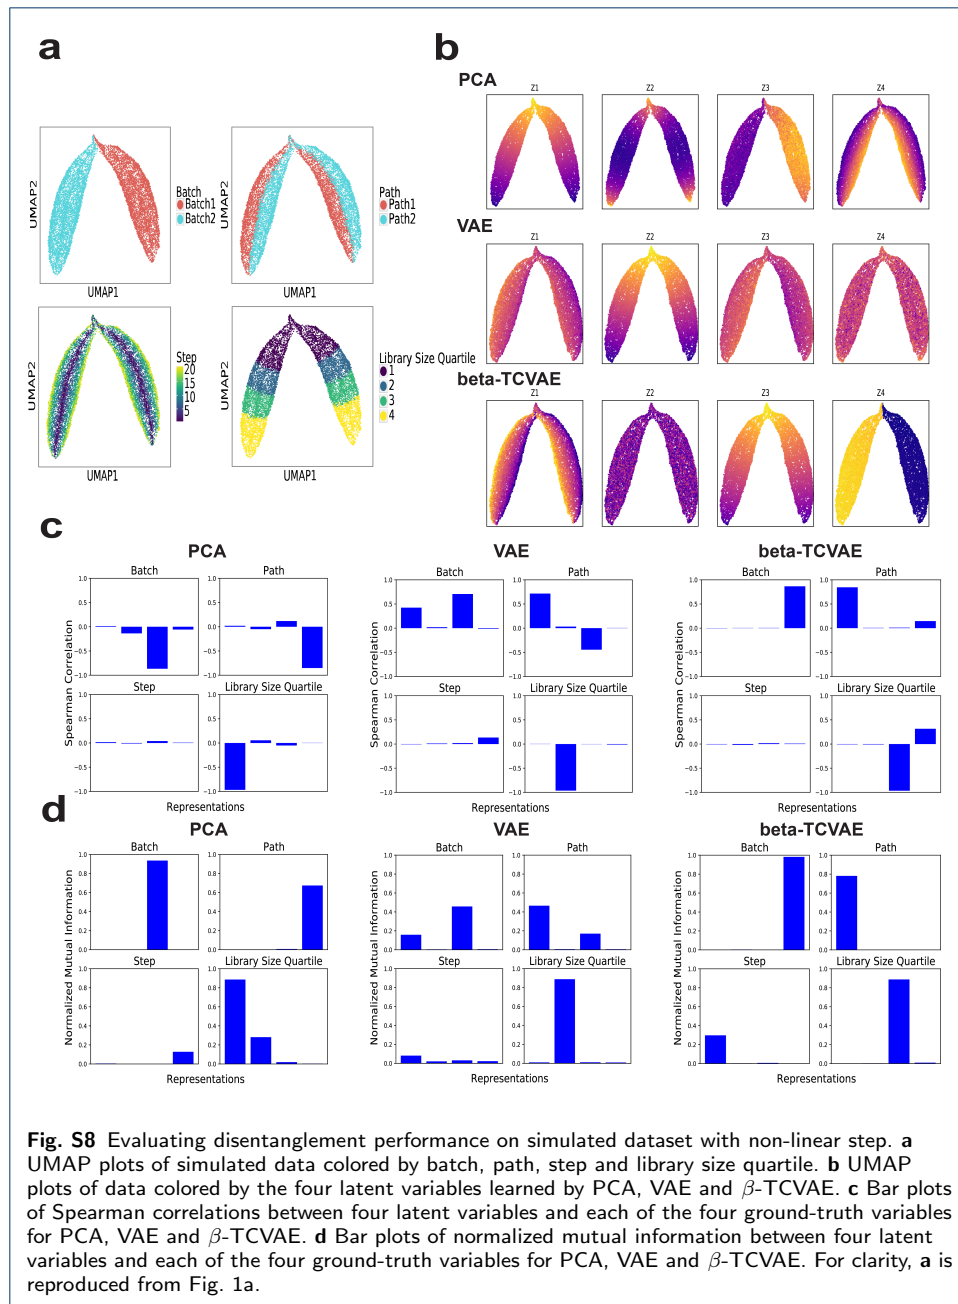



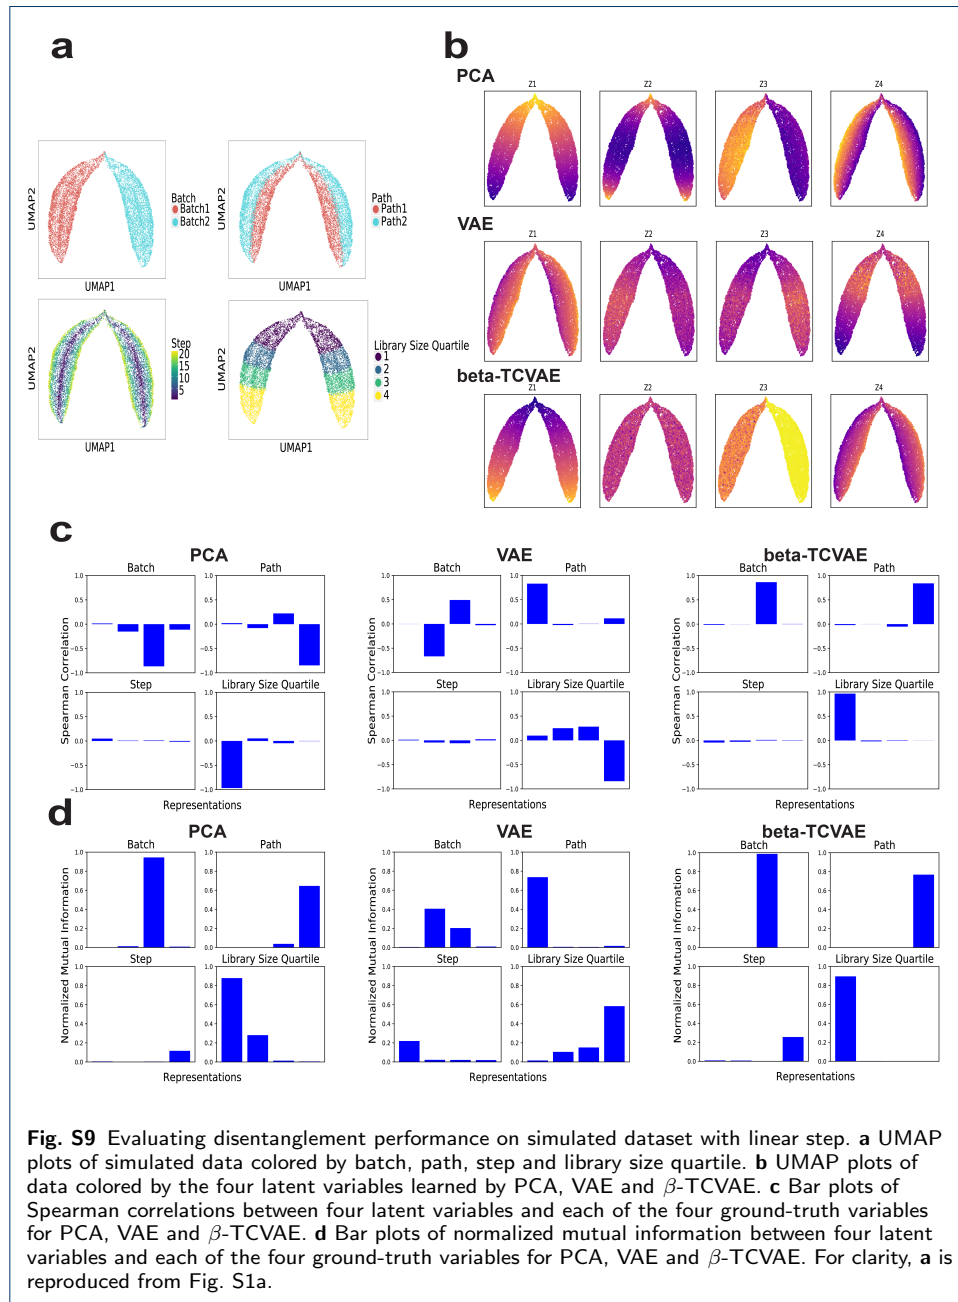

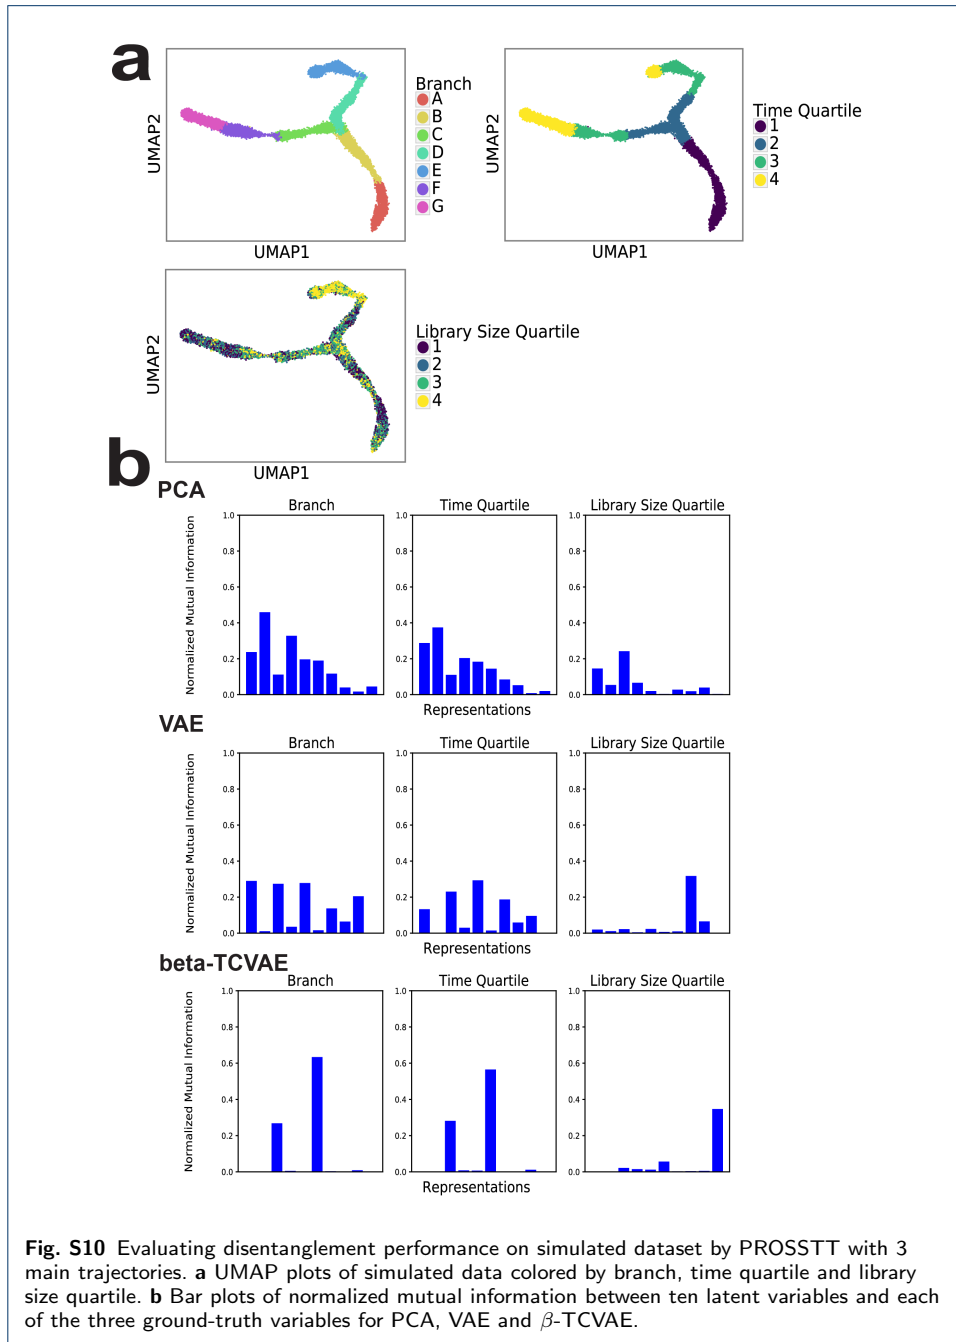

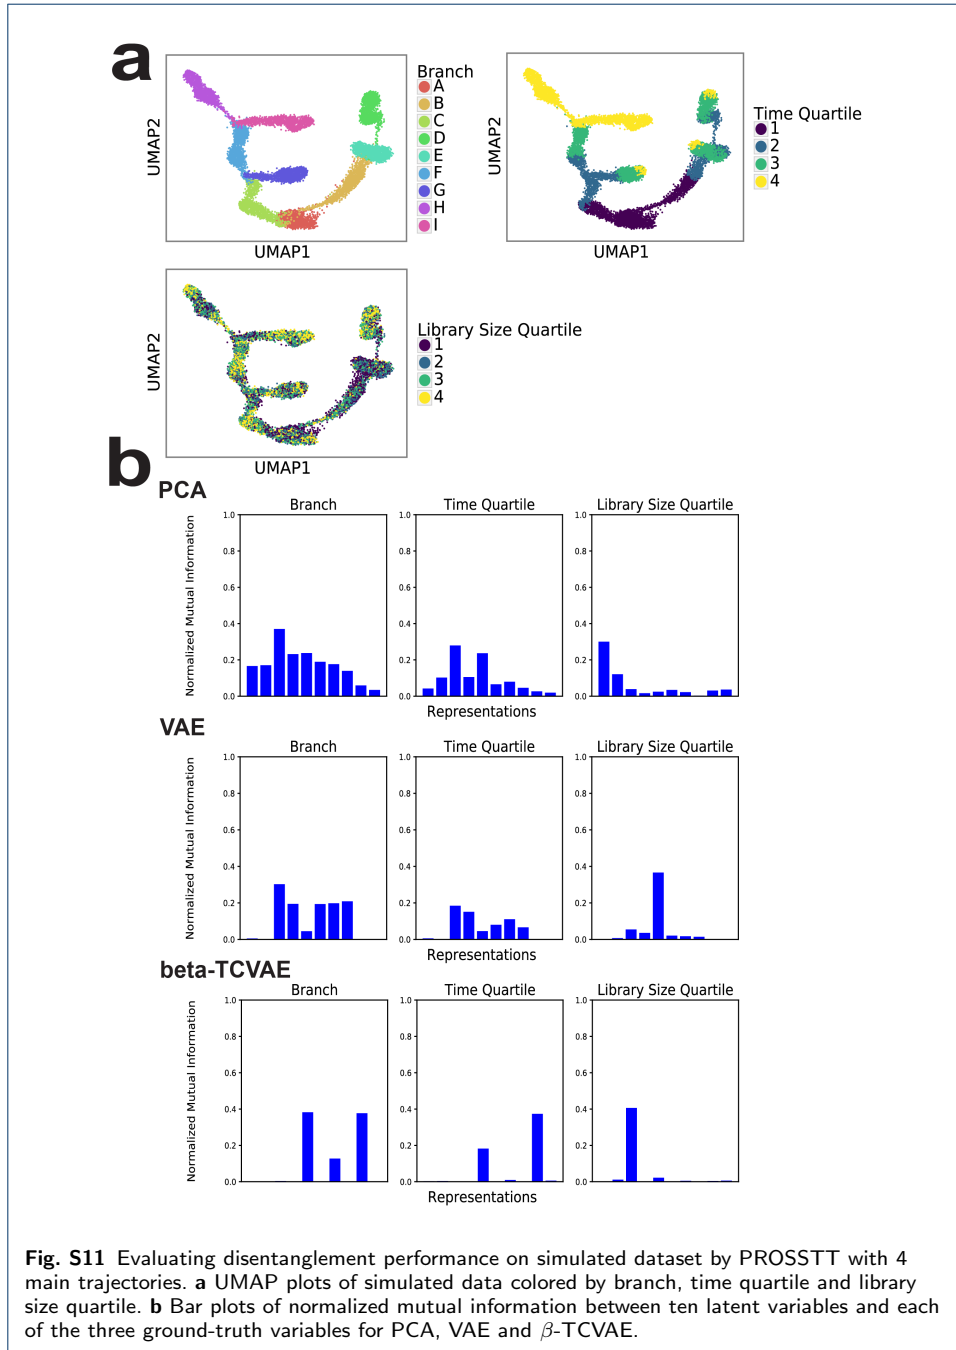

**Fig. S11** Evaluating disentanglement performance on simulated dataset by PROSSTT with 4 main trajectories. **a** UMAP plots of simulated data colored by branch, time quartile and library size quartile. **b** Bar plots of normalized mutual information between ten latent variables and each of the three ground-truth variables for PCA, VAE and  $\beta$ -TCVAE.

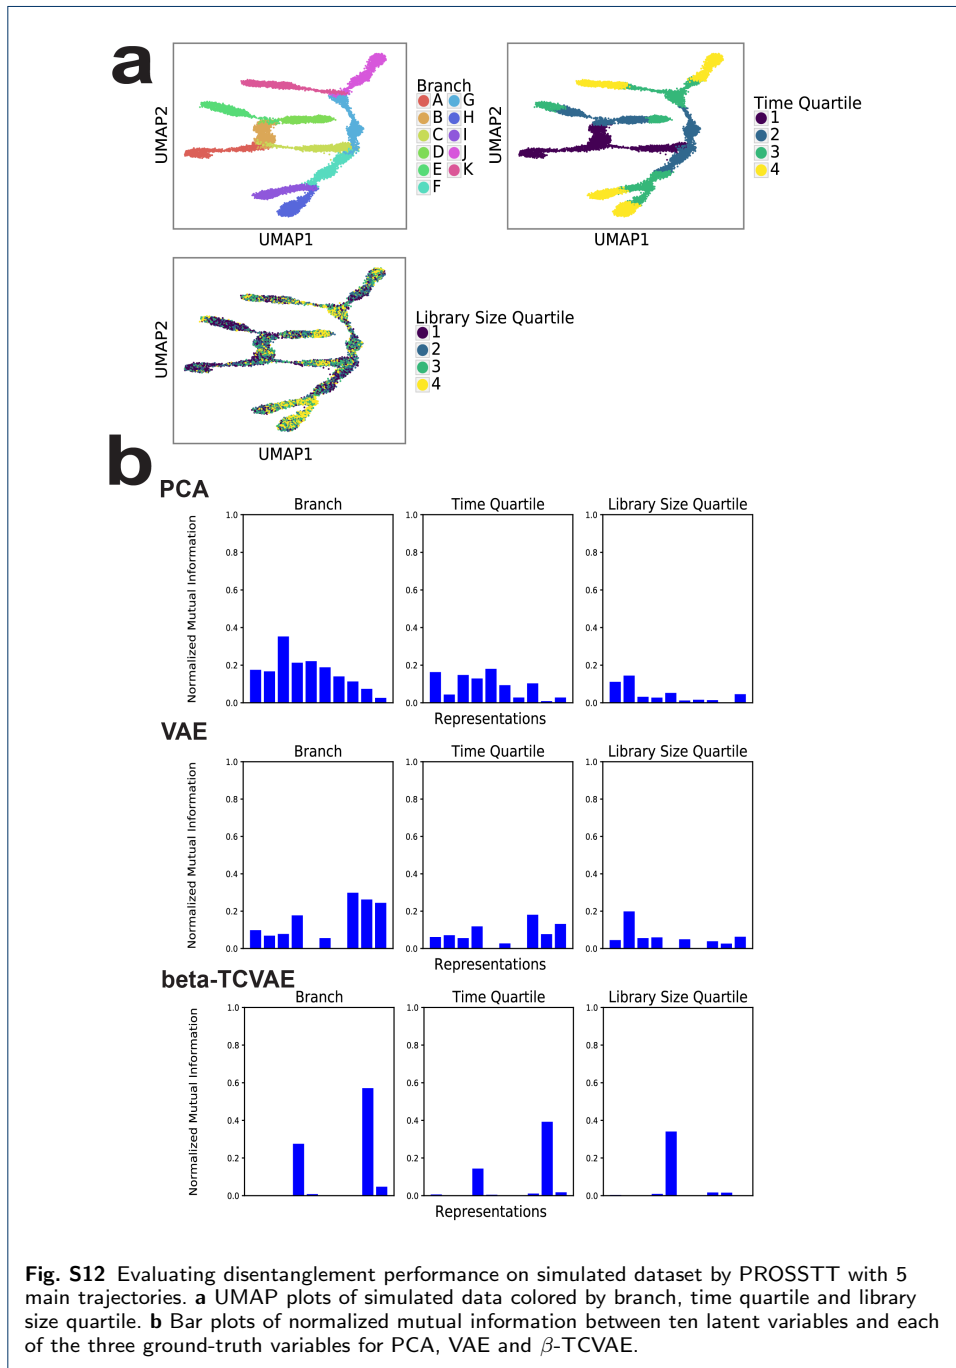

**Fig. S12** Evaluating disentanglement performance on simulated dataset by PROSSTT with 5 main trajectories. **a** UMAP plots of simulated data colored by branch, time quartile and library size quartile. **b** Bar plots of normalized mutual information between ten latent variables and each of the three ground-truth variables for PCA, VAE and  $\beta$ -TCVAE.

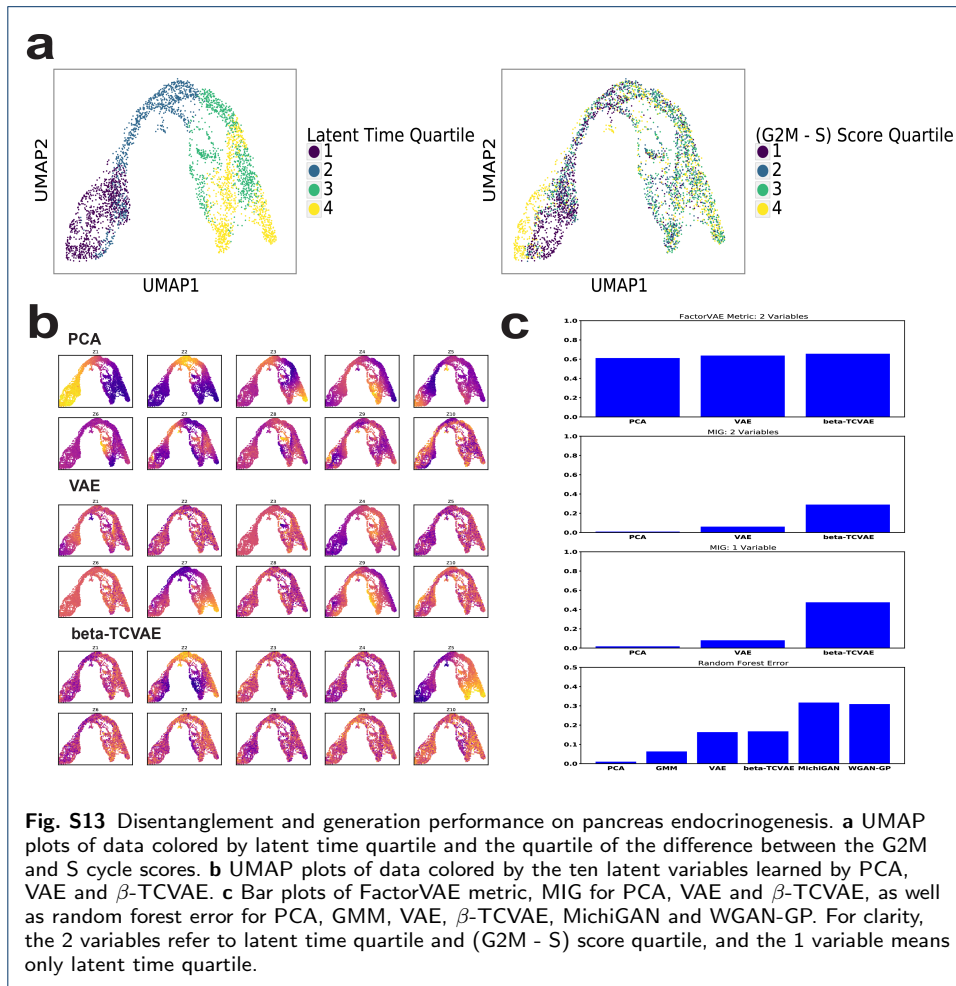

**Fig. S13** Disentanglement and generation performance on pancreas endocrinogenesis. **a** UMAP plots of data colored by latent time quartile and the quartile of the difference between the G2M and S cycle scores. **b** UMAP plots of data colored by the ten latent variables learned by PCA, VAE and  $\beta$ -TCVAE. **c** Bar plots of FactorVAE metric, MIG for PCA, VAE and  $\beta$ -TCVAE, as well as random forest error for PCA, GMM, VAE,  $\beta$ -TCVAE, MichiGAN and WGAN-GP. For clarity, the 2 variables refer to latent time quartile and (G2M - S) score quartile, and the 1 variable means only latent time quartile.

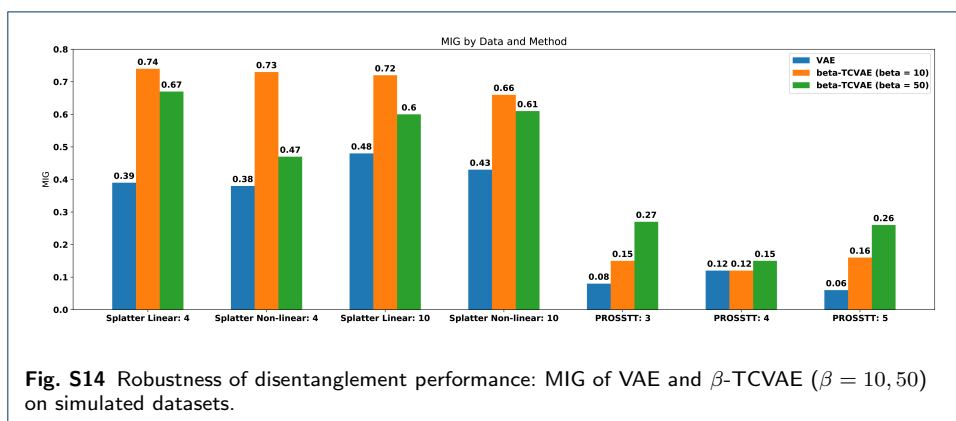

**Fig. S14** Robustness of disentanglement performance: MIG of VAE and  $\beta$ -TCVAE ( $\beta = 10, 50$ ) on simulated datasets.

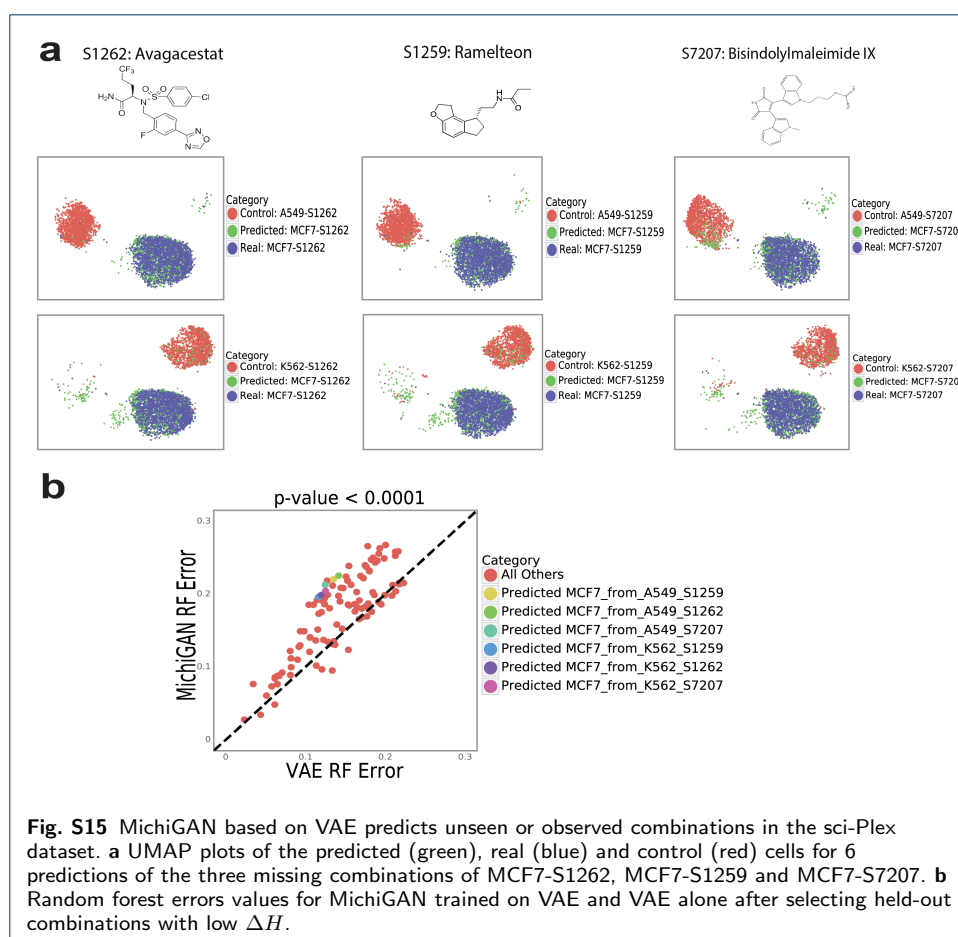

Supplement: 13059_2021_2373_MOESM1_ESM.pdf [file 13059_2021_2373_MOESM1_ESM.pdf]
